# Supplementary material for: A Face-To-Face Comparison of Tumor Chicken Chorioallantoic Membrane (TCAM) In Ovo with Murine Models for Early Evaluation of Cancer Therapy and Early Drug Toxicity
Source: MDPI journal article supplement (doi:10.3390/cancers14143548), 2022-07-21

**Figure S1. Representative pictures of in ovo tumors for the different cell lines used.**

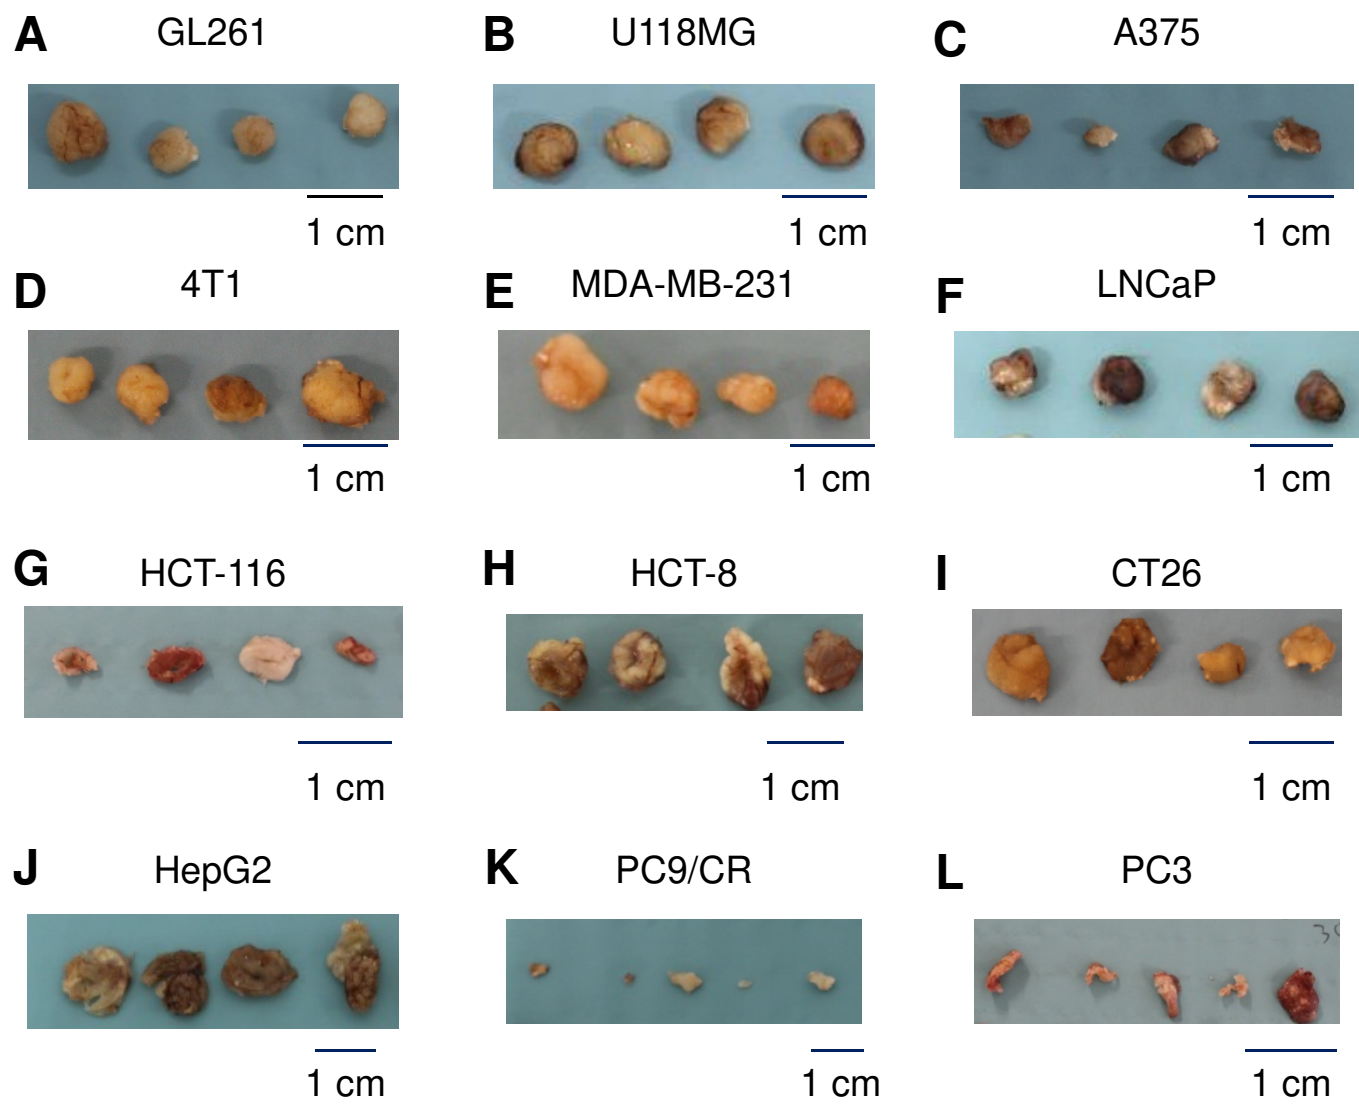

**Figure S2. Effect on tumor weight of anticancer drugs in various tumor CAM models.**

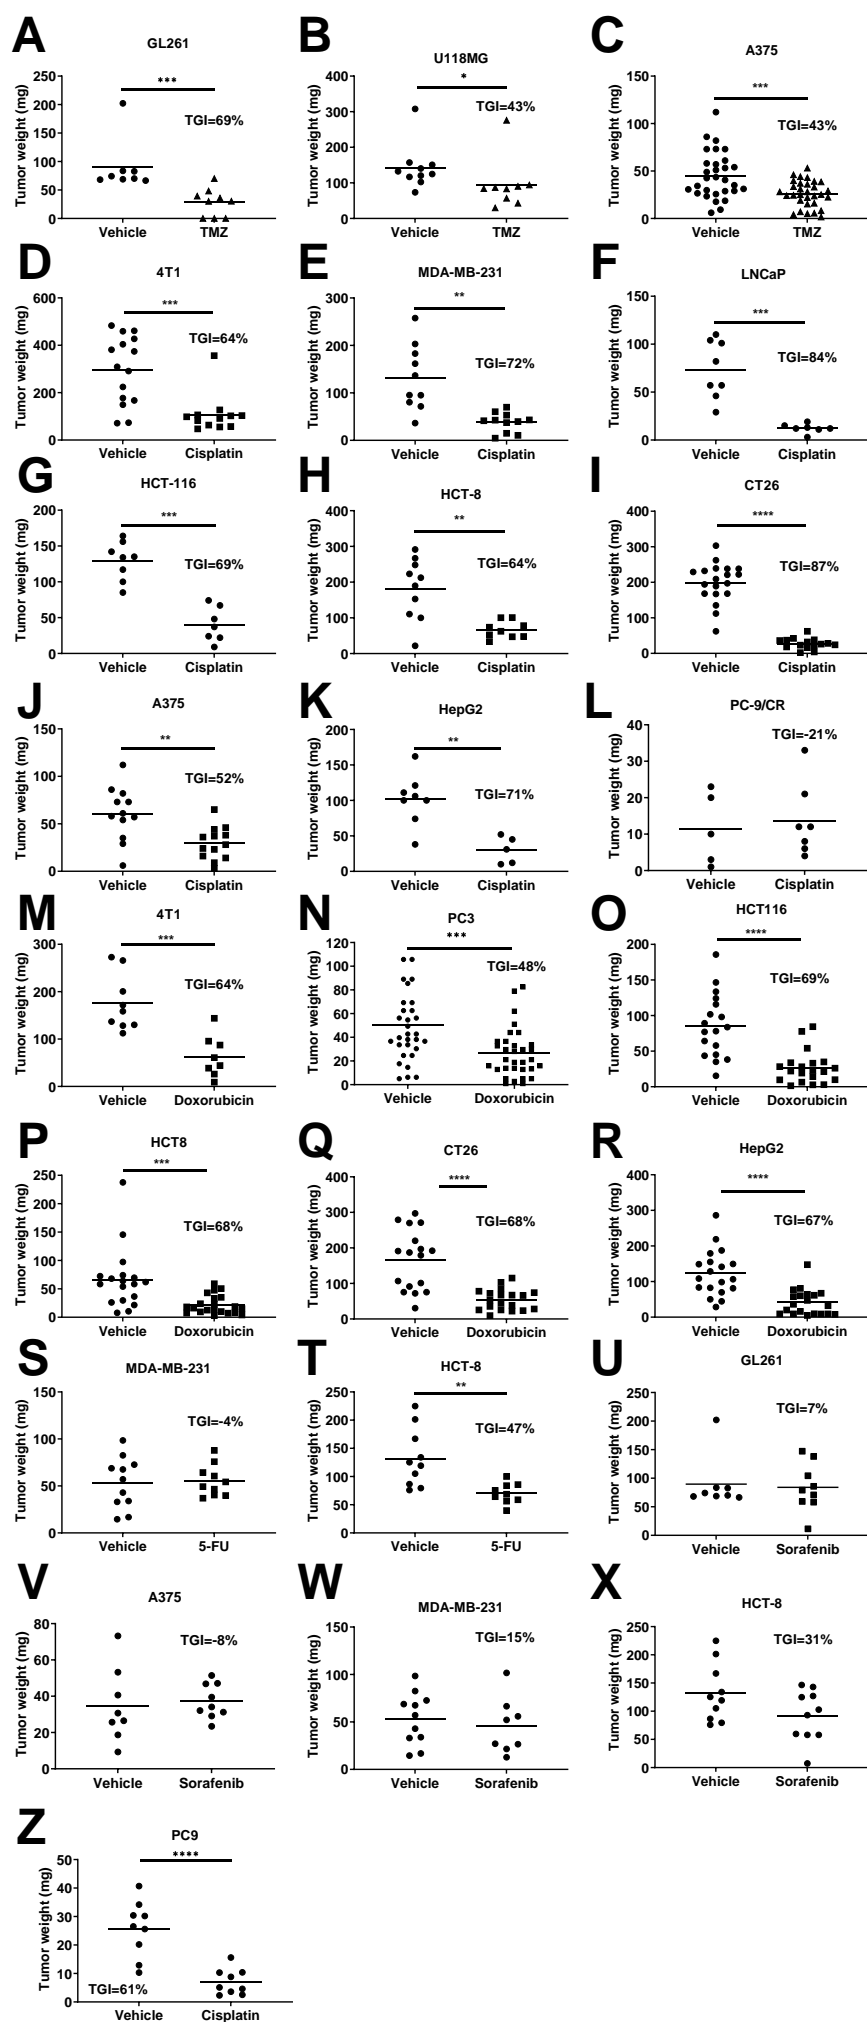

Supplement: s1 [file s1]
